# Supplementary material for: Relativity and the mercury battery
Source: Royal Society of Chemistry journal article supplement (doi:10.1039/c1cp21738k), 2011-01-01
Supplement: c1cp21738k.pdf [file c1cp21738k.pdf]

Cite this: DOI: 10.1039/c0xx00000x

www.rsc.org/pccp

**COMMUNICATION**

## **Relativity and the mercury battery (supplementary material)**

**Patryk Zaleski-Ejgierd<sup>a</sup> and Pekka Pyykkö<sup>a</sup>**

*Received (in XXX, XXX) Xth XXXXXXXXXX 20XX, Accepted Xth XXXXXXXXXX 20XX*

**DOI: 10.1039/b00000**

5

1. **Crystal structure of Zn(s)**
2. **Crystal structure of ZnO(s)**
3. **Crystal structure of Hg(s)**
4. **Crystal structure of HgO(s)**

10

## 1. Structure of Zn(s)

```
#-----  
# CRYSTAL DATA  
#-----  
5  
data_VESTA_phase_Zn  
  
_pd_phase_name           'Zn'  
_cell_length_a           2.66480  
10  _cell_length_b         2.66480  
_cell_length_c           4.94670  
_cell_angle_alpha        90  
_cell_angle_beta         90  
_cell_angle_gamma        120  
15  _symmetry_space_group_name_H-M  'P 63/m m c'  
_symmetry_Int_Tables_number 194  
  
loop_  
_symmetry_equiv_pos_as_xyz  
20  'x, y, z'  
    '-x, -y, -z'  
    '-y, x-y, z'  
    'y, -x+y, -z'  
    '-x+y, -x, z'  
25  'x-y, x, -z'  
    '-x, -y, z+1/2'  
    'x, y, -z+1/2'  
    'y, -x+y, z+1/2'  
    '-y, x-y, -z+1/2'  
30  'x-y, x, z+1/2'  
    '-x+y, -x, -z+1/2'  
    'y, x, -z'  
    '-y, -x, z'  
    'x-y, -y, -z'  
35  '-x+y, y, z'  
    '-x, -x+y, -z'  
    'x, x-y, z'  
    '-y, -x, -z+1/2'  
    'y, x, z+1/2'  
40  '-x+y, y, -z+1/2'  
    'x-y, -y, z+1/2'  
    'x, x-y, -z+1/2'  
    '-x, -x+y, z+1/2'  
  
45  loop_  
    _atom_site_label  
    _atom_site_occupancy  
    _atom_site_fract_x  
    _atom_site_fract_y  
50  _atom_site_fract_z  
    _atom_site_thermal_displace_type  
    _atom_site_B_iso_or_equiv  
    _atom_site_type_symbol  
    Zn      1.0    0.33333    0.66667    0.25000    Biso 1.000    Zn  
55  
  
60  
  
65  
  
70  #-----
```

## 2. Crystal structure of ZnO(s)

```
#-----  
# CRYSTAL DATA  
#-----  
5  
data_VESTA_phase_ZnO  
  
10  _pd_phase_name           'Zn O'  
    _cell_length_a         3.24900  
    _cell_length_b         3.24900  
    _cell_length_c         5.20700  
    _cell_angle_alpha      90  
    _cell_angle_beta       90  
15  _cell_angle_gamma      120  
    _symmetry_space_group_name_H-M 'P 63 m c'  
    _symmetry_Int_Tables_number 186  
  
20  loop_  
    _symmetry_equiv_pos_as_xyz  
      'x, y, z'  
      '-y, x-y, z'  
      '-x+y, -x, z'  
25  _symmetry_equiv_pos_as_xyz  
      '-x, -y, z+1/2'  
      'y, -x+y, z+1/2'  
      'x-y, x, z+1/2'  
      '-y, -x, z'  
      '-x+y, y, z'  
30  _symmetry_equiv_pos_as_xyz  
      'x, x-y, z'  
      'y, x, z+1/2'  
      'x-y, -y, z+1/2'  
      '-x, -x+y, z+1/2'  
  
35  loop_  
    _atom_site_label  
    _atom_site_occupancy  
    _atom_site_fract_x  
    _atom_site_fract_y  
    _atom_site_fract_z  
40  _atom_site_thermal_displace_type  
    _atom_site_B_iso_or_equiv  
    _atom_site_type_symbol  
    Zn      1.0    0.66667    0.33333    0          Biso  1.000  Zn  
    O       1.0    0.66667    0.33333    0.34500    Biso  1.000  O  
45  
  
50  
  
55  
  
60  
  
65  
  
70  #-----
```

### 3. Crystal structure of Hg(s)

```
#-----  
# CRYSTAL DATA  
#-----  
5  
data_VESTA_phase_1  
  
_pd_phase_name           'Hg'  
10  _cell_length_a         3.00504  
    _cell_length_b         3.00504  
    _cell_length_c         3.00504  
    _cell_angle_alpha      70.54171  
    _cell_angle_beta       70.54171  
15  _cell_angle_gamma      70.54171  
    _symmetry_space_group_name_H-M  'P 1'  
    _symmetry_Int_Tables_number      1  
  
loop_  
20  _symmetry_equiv_pos_as_xyz  
    'x, y, z'  
  
loop_  
25  _atom_site_label  
    _atom_site_occupancy  
    _atom_site_fract_x  
    _atom_site_fract_y  
    _atom_site_fract_z  
    _atom_site_thermal_displace_type  
30  _atom_site_B_iso_or_equiv  
    _atom_site_type_symbol  
    Hg1      1.0    0      0      0      0      0      0      0      0      0  
    Bis0  1.000  Hg  
  
35  
  
40  
  
45  
  
#-----  
50
```

**4. Crystal structure of HgO(s)**

```
#=====
# CRYSTAL DATA
#-----

data_VESTA_phase_HgO

10  _pd_phase_name           'Hg O'
    _cell_length_a         6.61290
    _cell_length_b         5.52080
    _cell_length_c         3.52190
    _cell_angle_alpha      90
15  _cell_angle_beta        90
    _cell_angle_gamma      90
    _symmetry_space_group_name_H-M  'P n m a'
    _symmetry_Int_Tables_number  62

20  loop_
    _symmetry_equiv_pos_as_xyz
      'x, y, z'
      '-x, -y, -z'
      '-x+1/2, -y, z+1/2'
25  'x+1/2, y, -z+1/2'
      '-x, y+1/2, -z'
      'x, -y+1/2, z'
      'x+1/2, -y+1/2, -z+1/2'
      '-x+1/2, y+1/2, z+1/2'

30  loop_
    _atom_site_label
    _atom_site_occupancy
    _atom_site_fract_x
35  _atom_site_fract_y
    _atom_site_fract_z
    _atom_site_thermal_displace_type
    _atom_site_U_iso_or_equiv
    _atom_site_type_symbol
40  Hg      1.0    0.11360    0.25000    0.24560    Uiso  0.015  Hg
    O       1.0    0.35920    0.25000    0.59550    Uiso  0.019  O

45

50

#-----
```

55
